# Supplementary material for: Long access to cocaine self‐administration dysregulates the glutamate synapse in the nucleus accumbens core of serotonin transporter knockout rats
Source: PubMed Central journal article supplement — Br J Pharmacol. 2021 May 20;179(17):4254–64. doi: 10.1111/bph.15496 (PMC9544393; doi:10.1111/bph.15496), 2021-05-20
Supplement: BPH-179-4254-s002.pdf [file BPH-179-4254-s002.pdf]

# Supplementary figure 1

- 1 = SERT<sup>+/+</sup> -naïve
- 2 = SERT<sup>+/+</sup> -ShA
- 3 = SERT<sup>+/+</sup> -LgA
- 4 = SERT<sup>-/-</sup> -naïve
- 5 = SERT<sup>-/-</sup> -ShA
- 6 = SERT<sup>-/-</sup> -LgA

## Gel 1

## Gel 2

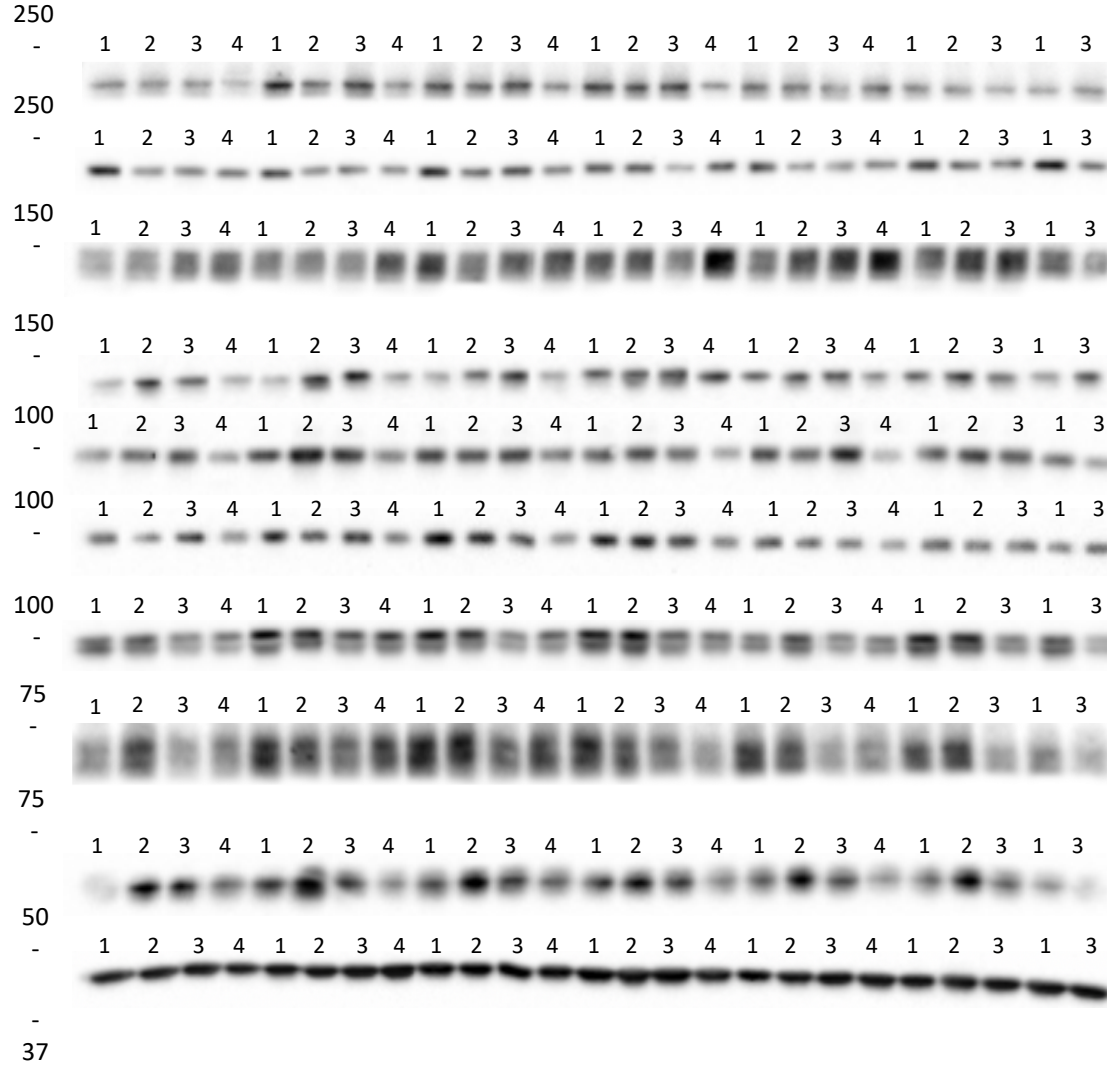

**GluN2A (180 kDa)**

**GluN2B (180 kDa)**

**SAP97 (97 kDa,  
predicted  
at 140 kDa)**

**GluN1 (120 kDa)**

**GluA1 (108 kDa)**

**GluA2 (108 kDa)**

**SAP102 (102 kDa)**

**vGlut1 (67 kDa)**

**GLT-1 (62 kDa)**

**$\beta$ -Actin (43 kDa)**

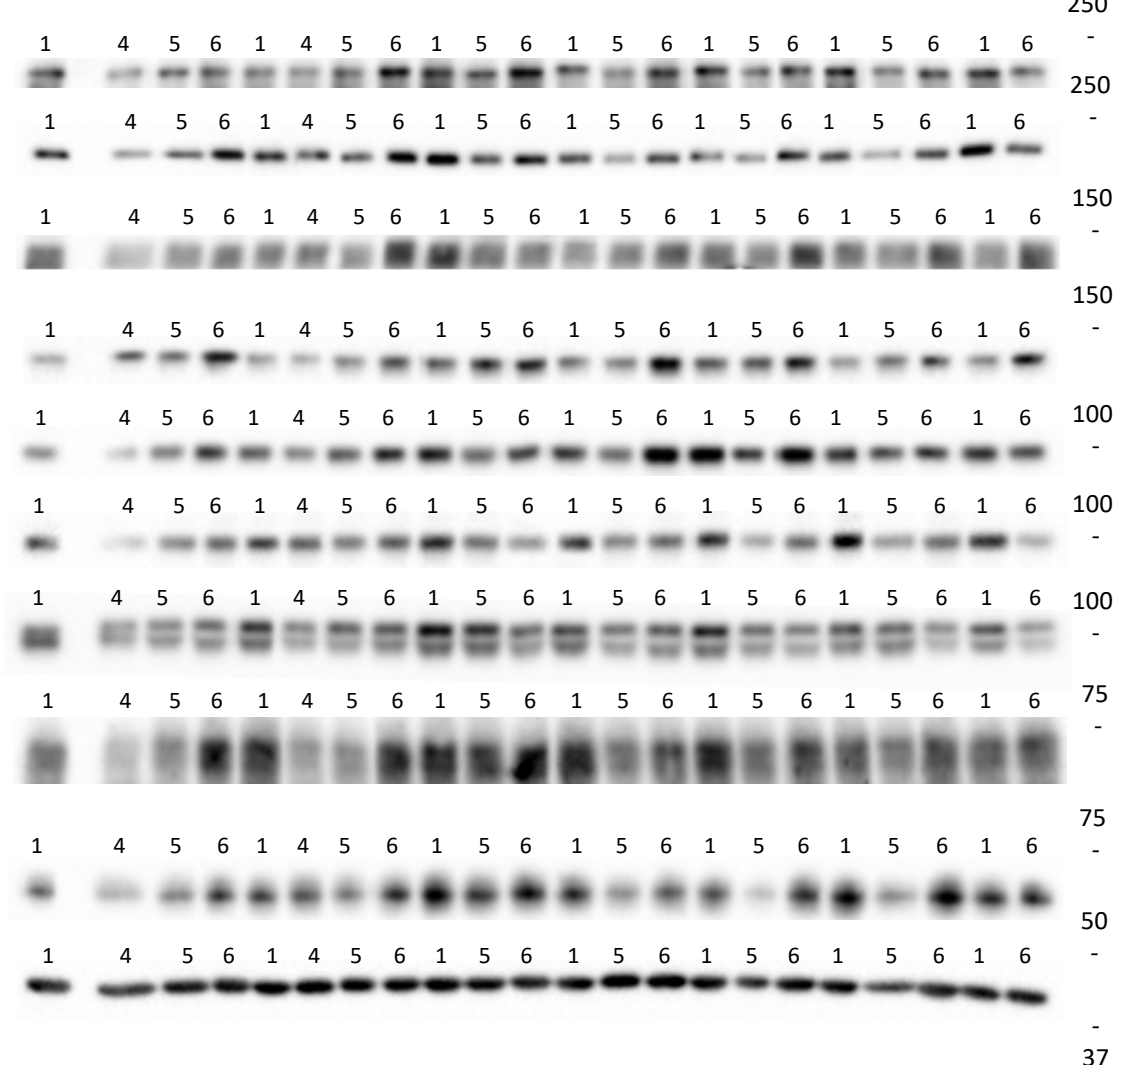

250

250

150

150

100

100

100

100

75

75

50

50

37

37
